# Supplementary material for: The Emerging Role of Major Regulatory RNAs in Cancer Control
Source: PubMed Central journal article supplement (PMC6771296; doi:10.3389/fonc.2019.00920), 2019-09-24
Supplement: Table_1.pdf [file Table_1.pdf]

**Supplementary Table 1. List of example clinical trials involving miRNAs as cancer biomarkers.**

| <b>miRNA</b> | <b>MiROvaR</b> | <b>7-miR panel</b> | <b>6-miR panel 1</b> | <b>6-miR panel 2</b> |
|--------------|----------------|--------------------|----------------------|----------------------|
| miR-100-3p   | Yes            |                    |                      |                      |
| miR-103a-3p  |                |                    | Yes                  |                      |
| miR-106b-5p  |                |                    | Yes                  |                      |
| miR-132      |                |                    |                      | Yes                  |
| miR-133a     |                | Yes                |                      |                      |
| miR-135b-5p  | Yes            |                    |                      |                      |
| miR-141-3p   | Yes            |                    |                      |                      |
| miR-143      |                | Yes                |                      |                      |
| miR-143-5p   | Yes            |                    | Yes                  |                      |
| miR-145      |                | Yes                |                      |                      |
| miR-151a-3p  | Yes            |                    |                      |                      |
| miR-192      |                | Yes                |                      |                      |
| miR-193a-5p  | Yes            |                    |                      |                      |
| miR-193b-5p  | Yes            |                    |                      |                      |
| miR-195-3p   | Yes            |                    |                      |                      |
| miR-200a     |                |                    |                      | Yes                  |
| miR-200a-3p  | Yes            |                    |                      |                      |
| miR-200b     |                |                    |                      | Yes                  |
| miR-200b-3p  | Yes            |                    |                      |                      |
| miR-200c     |                |                    |                      | Yes                  |
| miR-200c-3p  | Yes            |                    |                      |                      |
| miR-20a-5p   |                |                    | Yes                  |                      |
| miR-215      |                |                    | Yes                  |                      |
| miR-21-5p    |                |                    | Yes                  |                      |
| miR-23a-5p   | Yes            |                    |                      |                      |
| miR-29a      |                | Yes                |                      |                      |
| miR-29a-5p   | Yes            |                    |                      |                      |
| miR-29c      |                | Yes                |                      |                      |
| miR-29c-5p   | Yes            |                    |                      |                      |
| miR-30b-3p   | Yes            |                    |                      |                      |
| miR-30d-5p   | Yes            |                    |                      |                      |
| miR-330-3p   | Yes            |                    |                      |                      |
| miR-375      |                |                    |                      | Yes                  |
| miR-423-5p   | Yes            |                    |                      |                      |
| miR-429      | Yes            |                    |                      | Yes                  |
| miR-452-5p   | Yes            |                    |                      |                      |
| miR-484      | Yes            |                    |                      |                      |
| miR-486-5p   | Yes            |                    |                      |                      |
| miR-505      |                | Yes                |                      |                      |
| miR-506-3p   | Yes            |                    |                      |                      |
| miR-507      | Yes            |                    |                      |                      |
| miR-508-3p   | Yes            |                    |                      |                      |
| miR-509-3p   | Yes            |                    |                      |                      |
| miR-509-5p   | Yes            |                    |                      |                      |
| miR-513a-5p  | Yes            |                    |                      |                      |
| miR-513b-5p  | Yes            |                    |                      |                      |
| miR-514a-3p  | Yes            |                    |                      |                      |
| miR-574-5p   | Yes            |                    |                      |                      |
| miR-592      | Yes            |                    |                      |                      |
| miR-769-5p   | Yes            |                    |                      |                      |
| miR-890      | Yes            |                    |                      |                      |
| miR-99b-5p   | Yes            |                    |                      |                      |
